# Supplementary material for: Estimating the impact of climate change on the potential distribution of Indo-Pacific humpback dolphins with species distribution model
Source: PeerJ. 2021 Aug 17;9:e12001. doi: 10.7717/peerj.12001 (PMC8378342; doi:10.7717/peerj.12001)
Supplement: Supplemental Information 1 [file peerj-09-12001-s001.xlsx]

## Sheet: data
	lon	lat	eventDate	Souce
1	39.8226	16.3221	2006-6-10T00:00:00	OBIS
2	76	9.5	2015-6-5T00:00:00	OBIS
3	39.6458	15.4167	1994-11-1T00:00:00	OBIS
4	76.16	9.58	2015-6-5T00:00:00	OBIS
5	72.23	18.51	2015-6-5T00:00:00	OBIS
6	74.44	12.51	2015-6-5T00:00:00	OBIS
7	130.791	-12.4253	1905-7-2T00:00:00	OBIS
8	46.8773	-15.2159	2009-12-29T00:00:00	OBIS
9	92.75	12.5	2015-6-4T00:00:00	OBIS
10	33.05	-26.9883	2015-6-4T00:00:00	OBIS
11	51	26.5	1998-03-09T06:30:00	OBIS
12	39.8708	19.9169	2014-4-18T00:00:00	OBIS
13	45.2206	-12.7343	2006-06-21T14:42:51	OBIS
14	45.2105	-12.9847	2004-08-28T10:14:51	OBIS
15	40.3583	15.4919	1996-5-17T00:00:00	OBIS
16	73	10.9667	1990-02-01T07:40:00	OBIS
17	76.17	9.58	2015-6-5T00:00:00	OBIS
18	76.08	9.57	2015-6-5T00:00:00	OBIS
19	39.9059	16.2927	2006-3-10T00:00:00	OBIS
20	33.8155	27.4441	2016-12-21T00:00:00	OBIS
21	47.6379	-14.2763	2009-12-24T00:00:00	OBIS
22	76.23	9.57	2015-6-5T00:00:00	OBIS
23	45.2154	-12.9166	2004-08-14T09:13:02	OBIS
24	74.2582	11.9983	2020-1-18T00:00:00	OBIS
25	75.57	9.41	2015-6-5T00:00:00	OBIS
26	32.8799	29.2228	2014-11-18T00:00:00	OBIS
27	40.3552	15.8153	2005-9-23T00:00:00	OBIS
28	40.1047	15.9665	2006-1-10T00:00:00	OBIS
29	43.4969	-21.1517	2010-1-27T00:00:00	OBIS
30	76.14	9.57	2015-6-5T00:00:00	OBIS
31	43.4531	-21.1635	2010-1-27T00:00:00	OBIS
32	79	8.5	1765-07-02T12:00:00Z	OBIS
33	38.3732	23.7483	2014-1-20T00:00:00	OBIS
34	45.2444	-13.0135	2005-01-27T09:57:57	OBIS
35	33.8799	27.2643	2011-12-1T00:00:00	OBIS
36	39.505	16.6814	2005-11-18T00:00:00	OBIS
37	43.5275	-21.1437	2010-1-27T00:00:00	OBIS
38	40.6167	15.6	1994-2-1T00:00:00	OBIS
39	47.6296	-14.1775	2009-12-24T00:00:00	OBIS
40	43.0933	-21.9956	2010-1-27T00:00:00	OBIS
41	76.06	9.58	2015-6-5T00:00:00	OBIS
42	78.8867	8.9532	2002-2011	OBIS
43	43.0962	-21.9925	2010-1-27T00:00:00	OBIS
44	40.3333	15.5	1996-5-18T00:00:00	OBIS
45	73.7833	15.4167	1990-01-31T14:45:00	OBIS
46	33.05	-26.9883	1765-07-02T12:00:00Z	OBIS
47	39.9754	16.1593	2006-4-10T00:00:00	OBIS
48	90	15	1765-07-02T12:00:00Z	OBIS
49	76.1	9.57	2015-6-5T00:00:00	OBIS
50	76	9.52	2015-6-5T00:00:00	OBIS
51	39.99	16.0333	1996-10-14T00:00:00	OBIS
52	40.0673	16.1307	2006-5-10T00:00:00	OBIS
53	45.2228	-12.731	2005-04-17T09:43:50	OBIS
54	33.8598	27.3836	2012-12-19T00:00:00	OBIS
55	76.04	9.58	2015-6-5T00:00:00	OBIS
56	45.2697	-12.7599	2006-01-20T08:01:58	OBIS
57	39.9	15.4633	1996-11-1T00:00:00	OBIS
58	113.173	3.39652	2008-06-13T15:06:00	OBIS
59	45.2149	-12.8972	2004-09-02T14:16:54	OBIS
60	32.56	-28.12	NA	OBIS
61	69.5	22.6	2015-6-4T00:00:00	OBIS
62	69.5	22.6	1765-07-02T12:00:00Z	OBIS
63	115.5	-20.3333	NA	OBIS
64	43.8751	-18.2724	2010-2-8T00:00:00	OBIS
65	39.4895	16.0294	1993-1-7T00:00:00	OBIS
66	74.6727	13.0867	2020-1-13T00:00:00	OBIS
67	113.319	3.57125	2009-02-18T07:47:00	OBIS
68	33.7491	27.6758	2011-7-22T00:00:00	OBIS
69	113.879	22.0137	NA	OBIS
70	113.853	22.3931	2021-04-04T20:49:49	GBIF
71	114.563	22.5544	2021-03-05T01:26:00	GBIF
72	107.127	20.6535	2012-03-22T14:13:00	GBIF
73	107.192	20.7852	2015-09-04T00:00:00	GBIF
74	113.874	22.2577	2019-02-12T12:37:00	GBIF
75	108.692	21.6953	2019-10-03T07:34:00	GBIF
76	108.604	21.6471	2019-10-03T06:59:00	GBIF
77	120.398	24.3024	2008-06-22T08:15:00	GBIF
78	120.231	24.2721	2008-06-22T13:23:00	GBIF
79	120.309	24.316	2008-06-22T11:32:00	GBIF
80	108.671	21.7693	2019-10-03T07:24:00	GBIF
81	108.661	21.7768	2019-10-03T07:34:00	GBIF
82	108.698	21.6162	2019-10-03T07:22:00	GBIF
83	108.733	21.6409	2019-10-03T07:22:00	GBIF
84	108.646	21.6922	2019-10-03T07:16:00	GBIF
85	114.117	22.2981	2015-02-07T12:13:00	GBIF
86	113.89	22.3657	2013-09-29T11:04:00	GBIF
87	54.354	24.5281	2003-03-07T00:00:00	GBIF
88	113.834	22.2159	2017-04-19T00:00:00	GBIF
89	113.901	22.3678	2015-04-10T00:00:00	GBIF
90	113.902	22.3458	2011-06-05T00:00:00	GBIF
91	113.889	22.3891	2013-11-29T00:00:00	GBIF
92	99.841	9.33119	2014-07-24T00:00:00	GBIF
93	99.7961	9.31775	2016-07-11T00:00:00	GBIF
94	99.7696	9.32317	2016-07-11T00:00:00	GBIF
95	113.832	22.38	2016-05-08T20:50:00	GBIF
96	0	0	2002-07-01T00:00:00	GBIF
97	85.1375	19.4156	2009-02-15T00:00:00	GBIF
98	113.624	22.3161	2013-10-16T10:22:53	GBIF
99	103.868	1.3031	2017-10-14T15:43:00	GBIF
100	113.745	22.1149	2014-03-27T15:08:00	GBIF
101	79.8472	10.2792	2009-12-25T00:00:00	GBIF
102	110.426	20.5929	2014-04-10T10:03:00	GBIF
103	50.707	26.2109	2019-02-27T00:00:00	GBIF
104	113.801	22.3995	2019-04-28T14:59:33	GBIF
105	100.034	12.2552	2019-02-10T13:48:00	GBIF
106	113.982	22.2008	2018-01-15T14:20:00	GBIF
107	120.217	24.0542	2010-08-12T09:25:00	GBIF
108	113.925	22.3333	1996-05-31T00:00:00	GBIF
109	113.882	22.2935	2017-12-08T10:54:00	GBIF
110	113.946	22.2996	2016-02-28T11:52:00	GBIF
111	114.07	22.3704	2018-08-07T18:18:50	GBIF
112	99.9234	9.34452	2014-05-08T00:00:00	GBIF
113	120.236	24.0978	2018-07-14T11:36:00	GBIF
114	113.868	22.1706	2014-09-11T19:57:00	GBIF
115	113.821	22.2762	2015-01-17T00:00:00	GBIF
116	113.979	22.3637	2014-02-18T14:02:00	GBIF
117	113.862	22.2746	2015-11-22T02:59:00	GBIF
118	113.568	22.8864	NA	GBIF
119	39.4756	-6.45417	NA	GBIF
120	113.876	22.2987	2011-12-19T17:07:00	GBIF
121	114.138	22.226	2011-06-04T21:58:00	GBIF
122	72.55	20.42	1976-12-16T00:00:00	GBIF
123	136.5	-11.6167	1984-03-23T00:00:00	GBIF
124	153.433	-27.4	1999-08-05T00:00:00	GBIF

## Sheet: description
lon	longitude in degrees
lat	latitude in degrees
eventData	data of the presence
source	source of data
GBIF	Global Biodiversity Information Facility (GBIF, https://www.gbif.org)
OBIS	Ocean Biogeographic Information System (OBIS, https://obis.org)
