# Supplementary material for: Estimating the impact of climate change on the potential distribution of Indo-Pacific humpback dolphins with species distribution model
Source: PeerJ. 2021 Aug 17;9:e12001. doi: 10.7717/peerj.12001 (PMC8378342; doi:10.7717/peerj.12001)
Supplement: Supplemental Information 2 [file peerj-09-12001-s002.xlsx]

## Sheet: data
	lon	lat	eventDate	Souce
1	76	9.5	2015-6-5T00:00:00	OBIS
2	76.16	9.58	2015-6-5T00:00:00	OBIS
3	72.23	18.51	2015-6-5T00:00:00	OBIS
4	74.44	12.51	2015-6-5T00:00:00	OBIS
5	130.791	-12.4253	1905-7-2T00:00:00	OBIS
6	92.75	12.5	2015-6-4T00:00:00	OBIS
7	51	26.5	1998-03-09T06:30:00	OBIS
8	73	10.9667	1990-02-01T07:40:00	OBIS
9	76.17	9.58	2015-6-5T00:00:00	OBIS
10	76.08	9.57	2015-6-5T00:00:00	OBIS
11	76.23	9.57	2015-6-5T00:00:00	OBIS
12	74.2582	11.9983	2020-1-18T00:00:00	OBIS
13	75.57	9.41	2015-6-5T00:00:00	OBIS
14	76.14	9.57	2015-6-5T00:00:00	OBIS
15	79	8.5	1765-07-02T12:00:00Z	OBIS
16	76.06	9.58	2015-6-5T00:00:00	OBIS
17	78.8867	8.9532	2002-2011	OBIS
18	73.7833	15.4167	1990-01-31T14:45:00	OBIS
19	90	15	1765-07-02T12:00:00Z	OBIS
20	76.1	9.57	2015-6-5T00:00:00	OBIS
21	76	9.52	2015-6-5T00:00:00	OBIS
22	76.04	9.58	2015-6-5T00:00:00	OBIS
23	113.173	3.39652	2008-06-13T15:06:00	OBIS
24	69.5	22.6	2015-6-4T00:00:00	OBIS
25	69.5	22.6	1765-07-02T12:00:00Z	OBIS
26	115.5	-20.3333	NA	OBIS
27	74.6727	13.0867	2020-1-13T00:00:00	OBIS
28	113.319	3.57125	2009-02-18T07:47:00	OBIS
29	113.879	22.0137	NA	OBIS
30	113.853	22.3931	2021-04-04T20:49:49	GBIF
31	114.563	22.5544	2021-03-05T01:26:00	GBIF
32	107.127	20.6535	2012-03-22T14:13:00	GBIF
33	107.192	20.7852	2015-09-04T00:00:00	GBIF
34	113.874	22.2577	2019-02-12T12:37:00	GBIF
35	108.692	21.6953	2019-10-03T07:34:00	GBIF
36	108.604	21.6471	2019-10-03T06:59:00	GBIF
37	120.398	24.3024	2008-06-22T08:15:00	GBIF
38	120.231	24.2721	2008-06-22T13:23:00	GBIF
39	120.309	24.316	2008-06-22T11:32:00	GBIF
40	108.671	21.7693	2019-10-03T07:24:00	GBIF
41	108.661	21.7768	2019-10-03T07:34:00	GBIF
42	108.698	21.6162	2019-10-03T07:22:00	GBIF
43	108.733	21.6409	2019-10-03T07:22:00	GBIF
44	108.646	21.6922	2019-10-03T07:16:00	GBIF
45	114.117	22.2981	2015-02-07T12:13:00	GBIF
46	113.89	22.3657	2013-09-29T11:04:00	GBIF
47	54.354	24.5281	2003-03-07T00:00:00	GBIF
48	113.834	22.2159	2017-04-19T00:00:00	GBIF
49	113.901	22.3678	2015-04-10T00:00:00	GBIF
50	113.902	22.3458	2011-06-05T00:00:00	GBIF
51	113.889	22.3891	2013-11-29T00:00:00	GBIF
52	99.841	9.33119	2014-07-24T00:00:00	GBIF
53	99.7961	9.31775	2016-07-11T00:00:00	GBIF
54	99.7696	9.32317	2016-07-11T00:00:00	GBIF
55	113.832	22.38	2016-05-08T20:50:00	GBIF
56	85.1375	19.4156	2009-02-15T00:00:00	GBIF
57	113.624	22.3161	2013-10-16T10:22:53	GBIF
58	103.868	1.3031	2017-10-14T15:43:00	GBIF
59	113.745	22.1149	2014-03-27T15:08:00	GBIF
60	79.8472	10.2792	2009-12-25T00:00:00	GBIF
61	110.426	20.5929	2014-04-10T10:03:00	GBIF
62	50.707	26.2109	2019-02-27T00:00:00	GBIF
63	113.801	22.3995	2019-04-28T14:59:33	GBIF
64	100.034	12.2552	2019-02-10T13:48:00	GBIF
65	113.982	22.2008	2018-01-15T14:20:00	GBIF
66	120.217	24.0542	2010-08-12T09:25:00	GBIF
67	113.925	22.3333	1996-05-31T00:00:00	GBIF
68	113.882	22.2935	2017-12-08T10:54:00	GBIF
69	113.946	22.2996	2016-02-28T11:52:00	GBIF
70	114.07	22.3704	2018-08-07T18:18:50	GBIF
71	99.9234	9.34452	2014-05-08T00:00:00	GBIF
72	120.236	24.0978	2018-07-14T11:36:00	GBIF
73	113.868	22.1706	2014-09-11T19:57:00	GBIF
74	113.821	22.2762	2015-01-17T00:00:00	GBIF
75	113.979	22.3637	2014-02-18T14:02:00	GBIF
76	113.862	22.2746	2015-11-22T02:59:00	GBIF
77	113.568	22.8864	NA	GBIF
78	113.876	22.2987	2011-12-19T17:07:00	GBIF
79	114.138	22.226	2011-06-04T21:58:00	GBIF
80	72.55	20.42	1976-12-16T00:00:00	GBIF
81	136.5	-11.6167	1984-03-23T00:00:00	GBIF
82	153.433	-27.4	1999-08-05T00:00:00	GBIF

## Sheet: description
lon	longitude in degrees
lat	latitude in degrees
eventData	data of the presence
source	source of data
GBIF	Global Biodiversity Information Facility (GBIF, https://www.gbif.org)
OBIS	Ocean Biogeographic Information System (OBIS, https://obis.org)
